# Supplementary material for: Spatial-Temporal Footprints Assessment and Driving Mechanism of China Household Diet Based on CHNS
Source: MDPI journal article supplement (doi:10.3390/foods10081858), 2021-08-11
Supplement: s1 [file s1]

Supplementary Materials for:

# Spatial-temporal footprints assessment and driving mechanism of China household diet based on CHNS

Yanling Long <sup>1,2</sup>, Runzhi Hu <sup>1,2</sup>, Tuo Yin <sup>1,2</sup>, Pengxiang Wang <sup>1,2</sup>, Jiamin Liu <sup>1,2</sup>, Tahir Muhammad <sup>1,2</sup>, Xiuzhi Chen <sup>1,2</sup>, \*, Yunkai Li <sup>1,2</sup>

<sup>1</sup> College of Water Resources and Civil Engineering, China Agricultural University, Beijing 100083, China.

<sup>2</sup> Engineering Research Center for Agricultural Water-Saving and Water Resources, Ministry of Education, Beijing 100083, China.

\* Correspondence: chxz@cau.edu.cn; Tel.: 86-106-2738-485

## **This supplementary file includes:**

**Section 1. Spatial-temporal analysis and composition characteristics for multiple footprints of food consumption**

**Figure S1. Spatial-temporal analysis and composition characteristics for multiple footprints of 12 provinces in 2000, 2004, 2006, 2009, 2011**

**Section 2. Spatial-temporal analysis for multiple footprints of food consumption**

**Figure S2. Spatial-temporal analysis for WF**

**Figure S3. Spatial-temporal analysis for CF**

**Figure S4. Spatial-temporal analysis for NF**

**Figure S5. Spatial-temporal analysis for EF**

**Figure S6. Spatial-temporal analysis for LF**

## Section 1. Spatial-temporal analysis and composition characteristics for multiple footprints of food consumption

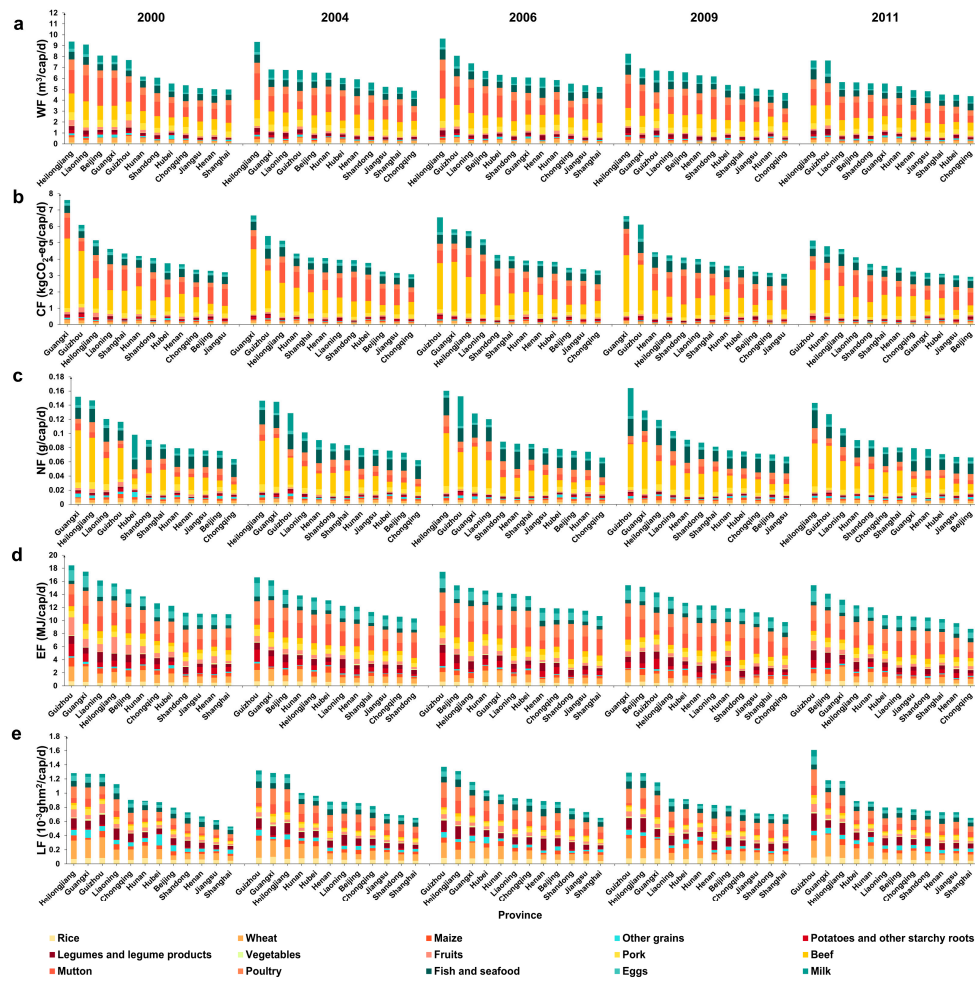

**Figure S1.** Spatial-temporal analysis and composition characteristics for multiple footprints of 12 provinces in 2000, 2004, 2006, 2009, 2011 (a: WF; b: CF; c: NF; d: EF; e: LF).

As shown in Figure S1, in 2000, the highest food consumption WF was  $9.38 \text{ m}^3/\text{cap}/\text{d}$ , in Heilongjiang, while the lowest was  $4.98 \text{ m}^3/\text{cap}/\text{d}$ , in Shanghai. In 2011, the highest food consumption WF was  $7.64 \text{ m}^3/\text{cap}/\text{d}$ , in Heilongjiang, while the lowest was  $4.38 \text{ m}^3/\text{cap}/\text{d}$ , in Chongqing.

In 2000, the highest food consumption CF was  $7.61 \text{ kgCO}_2\text{eq}/\text{cap}/\text{d}$ , in Guangxi, while the lowest was  $3.20 \text{ kgCO}_2\text{eq}/\text{cap}/\text{d}$ , in Jiangsu. In 2011, the highest food consumption CF was  $5.14 \text{ kgCO}_2\text{eq}/\text{cap}/\text{d}$ , in Guizhou, while the lowest was  $2.93 \text{ kgCO}_2\text{eq}/\text{cap}/\text{d}$ , in Beijing.

In 2000, the highest food consumption NF was  $0.15 \text{ g}/\text{cap}/\text{d}$ , in Guangxi, while the lowest was  $0.06 \text{ g}/\text{cap}/\text{d}$ , in Chongqing. In 2011, the highest food consumption NF was  $0.14 \text{ g}/\text{cap}/\text{d}$ , in Heilongjiang, while the lowest was  $0.07 \text{ g}/\text{cap}/\text{d}$ , in Beijing.

In 2000, the highest food consumption EF was  $18.45 \text{ MJ}/\text{cap}/\text{d}$ , in Guizhou, while the lowest was  $10.97 \text{ MJ}/\text{cap}/\text{d}$ , in Chongqing. In 2011, the highest food consumption EF was  $15.41 \text{ MJ}/\text{cap}/\text{d}$ , in Guizhou, while the lowest was  $8.74 \text{ MJ}/\text{cap}/\text{d}$ , in Chongqing.

In 2000, the highest food consumption LF was  $1.28 \times 10^{-3} \text{ ghm}^2/\text{cap}/\text{d}$ , in Heilongjiang, while the lowest was  $0.53 \times 10^{-3} \text{ ghm}^2/\text{cap}/\text{d}$ , in Chongqing. In 2011, the highest food consumption LF was  $1.61 \times 10^{-3} \text{ ghm}^2/\text{cap}/\text{d}$ , in Guizhou, while the lowest was  $0.65 \times 10^{-3} \text{ ghm}^2/\text{cap}/\text{d}$ , in Shanghai.

## Section 2. Spatial-temporal analysis for multiple footprints of food consumption

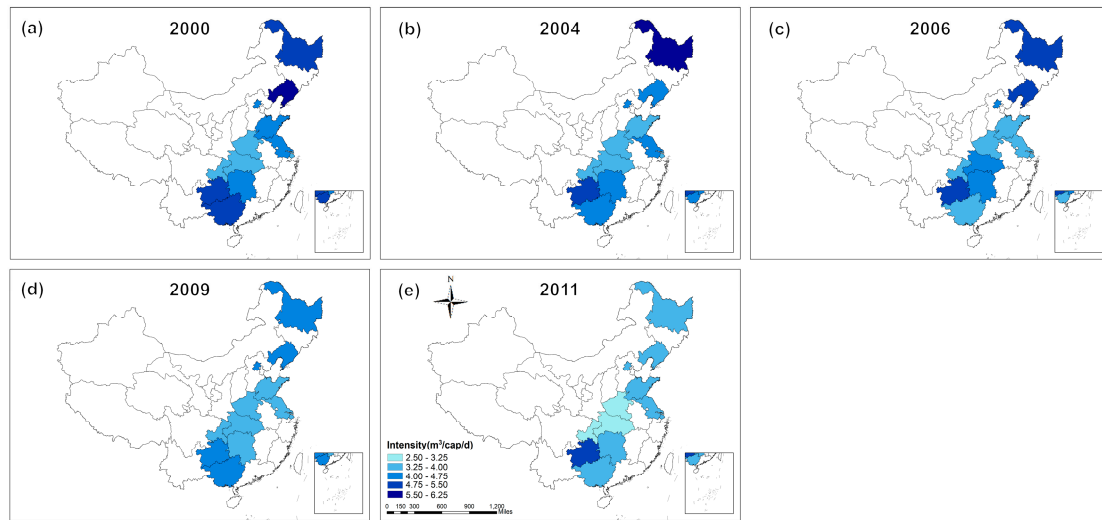

**Figure S2.** Spatial-temporal analysis for WF (a: year of 2000; b: year of 2004; c: year of 2006; d: year of 2009; e: year of 2011).

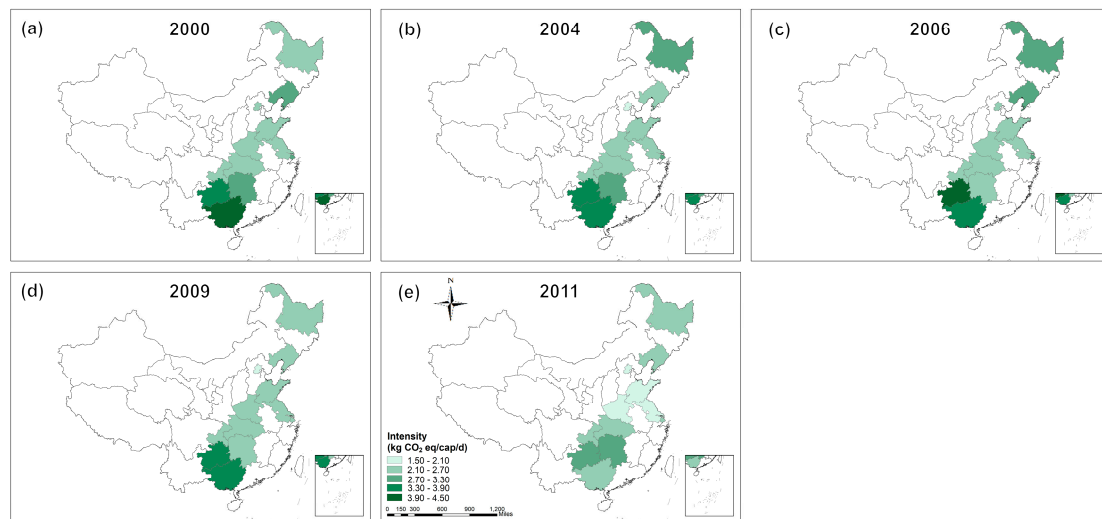

**Figure S3.** Spatial-temporal analysis for CF (a: year of 2000; b: year of 2004; c: year of 2006; d: year of 2009; e: year of 2011)

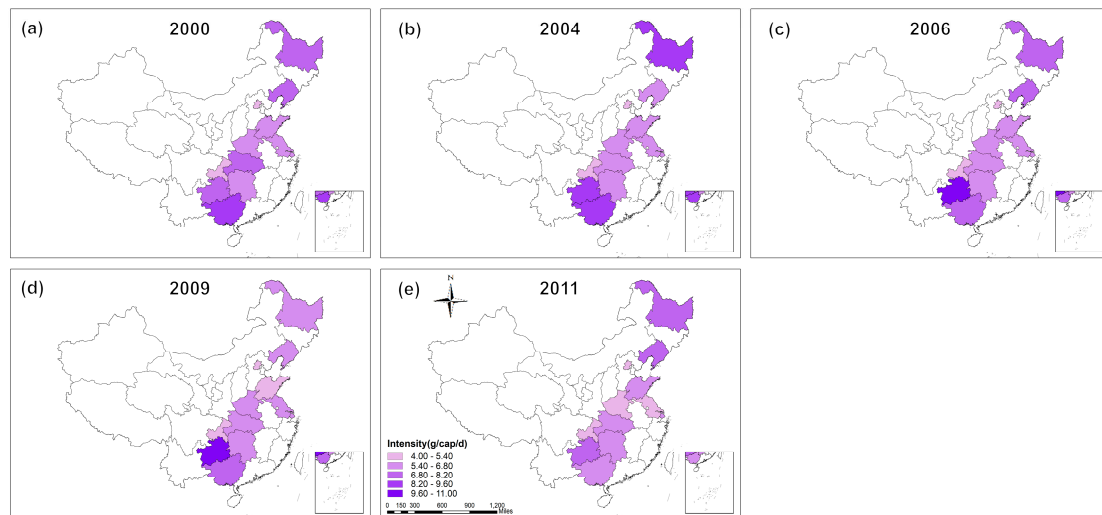

**Figure S4.** Spatial-temporal analysis for NF (a: year of 2000; b: year of 2004; c: year of 2006; d: year of 2009; e: year of 2011)

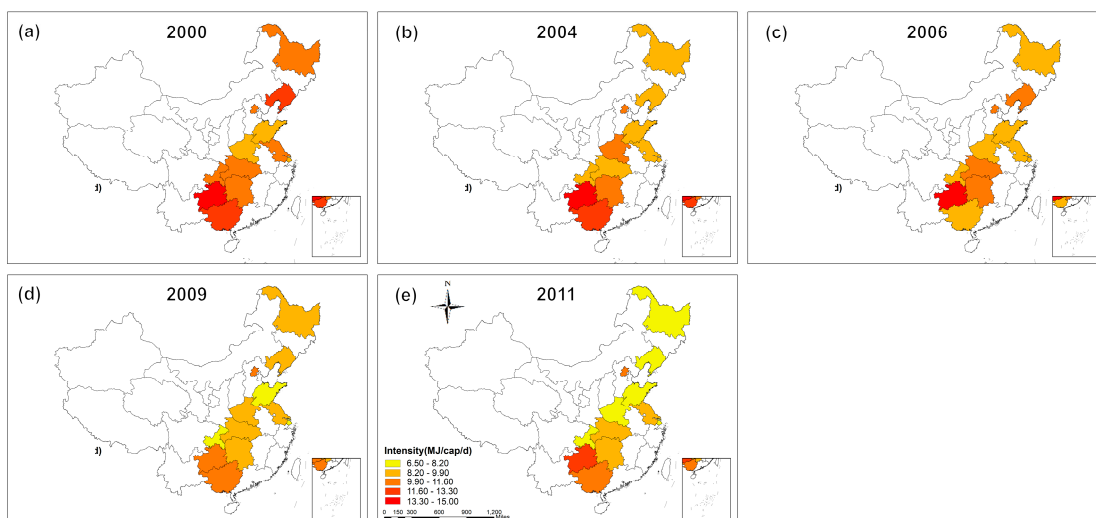

**Figure S5.** Spatial-temporal analysis for EF (a: year of 2000; b: year of 2004; c: year of 2006; d: year of 2009; e: year of 2011)

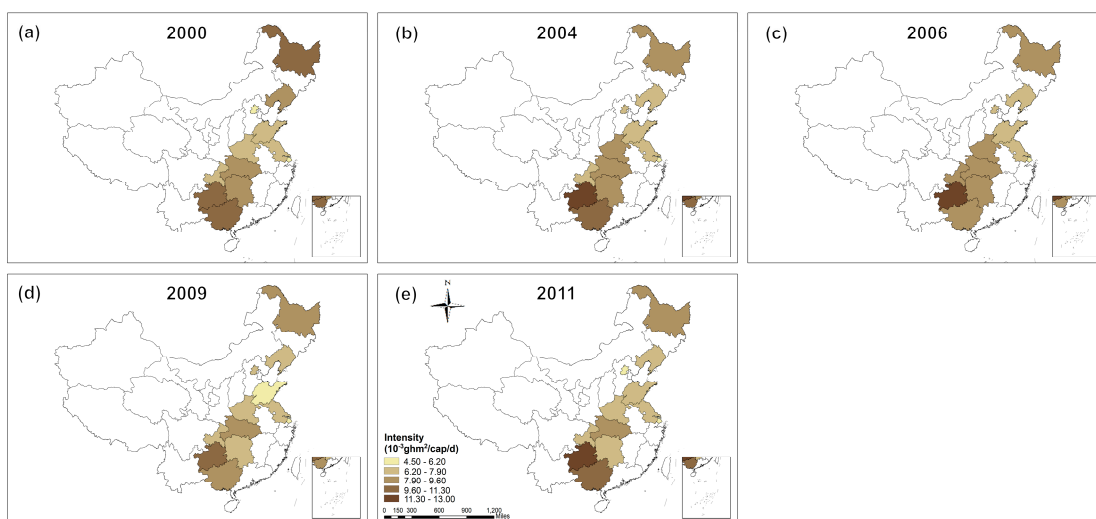

**Figure S6.** Spatial-temporal analysis for LF (a: year of 2000; b: year of 2004; c: year of 2006; d: year of 2009; e: year of 2011)
